# Supplementary material for: Topological Analysis of MAPK Cascade for Kinetic ErbB Signaling
Source: PLoS One. 2008 Mar 12;3(3):e1782. doi: 10.1371/journal.pone.0001782 (PMC2262155; doi:10.1371/journal.pone.0001782)
Supplement: Table S5 — (0.02 MB XLS) [file pone.0001782.s006.xls]

## Sheet: Sheet1
Table S5. Rate equations and parameter values of the topological model
Reaction number	Rate equation	Parameter values (estimated)
		V	Km
1	V1[Ras-GTP][Raf-1] / (Km1+[Raf-1])	26.9	0.00061
2	V2[Raf-1*] / (Km2+[Raf-1*])	0.224	0.0161
3	V3[Rap1-GTP][B-Raf] / (Km3+[B-Raf])	7.87e-06	0.00021
4	V4[B-Raf*] / (Km4+[B-Raf*])	0.00898	1.92
5	V5[Raf-1*][MEK] / (Km5+[MEK])	0.0638	0.101
6	V6[B-Raf*][MEK]/(Km6(1.0+(Raf-1*/Km14))+[MEK])	0.208	0.000461
7	V7[PP2A][MEKPP] / (Km7+[MEKPP])	0.168	0.0323
8	V8[MEKPP][ERK]/ (Km8(1.0+(ERKP/Km9))+[ERK])	825	6.53e-05
9	V9[MEKPP][ERKP]/ (Km9(1.0+(ERK/Km8))+[ERKP])	5.78e-05	0.07
10	V10[MKP3][ERKP]/ (Km10(1.0+(ERKPP/Km11))+[ERKP])	2.84	0.0513
11	V11[MKP3][ERKPP] / (Km11(1.0+(ERKP/Km10))+[ERKPP])	0.234	0.0227
14	V14[B-Raf*][Raf-1*]/ {Km14(1.0+(MEK/Km6))+[Raf-1*]}	2830	0.213
16	V16[ERKPP][B-Raf][/ (Km16+[B-Raf])	0.00364	0.167
The reaction numbers correspond to those in Figure 2. The total concentration of each protein equals to 1.
